# Supplementary material for: Numerical simulation of depressurization exploitation in class 1 hydrate reservoirs under different development factors in Shenhu area, South China sea
Source: Frontiers journal article supplement (doi:10.3389/feart.2024.1444690), 2024-08-20
Supplement: Data_Sheet_1.docx [file Data_Sheet_1.docx]

Supplementary Material

# Supplementary Figures


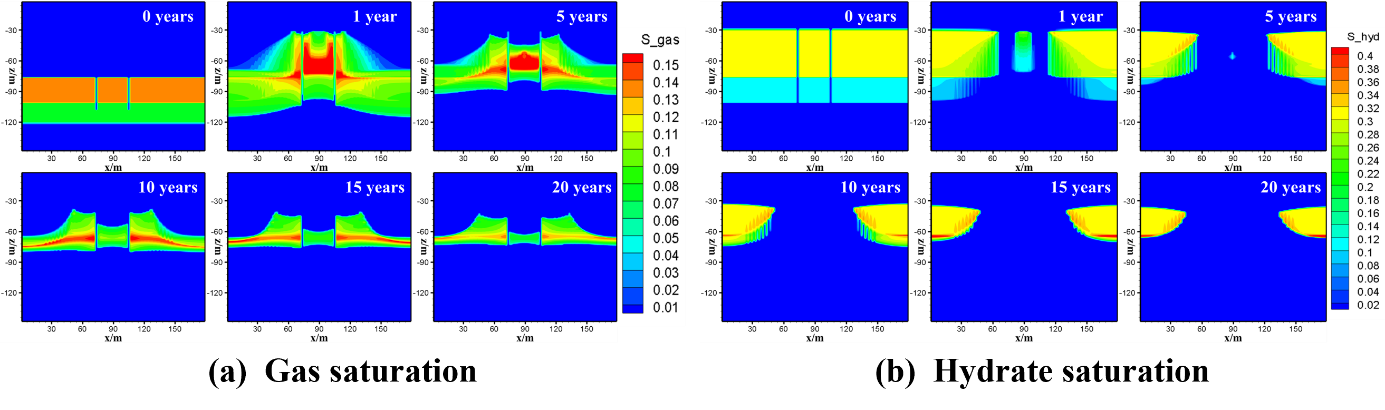


Figure 1. Spatiotemporal evolution of gas saturation field and hydrate saturation field, well spacing of 30m.


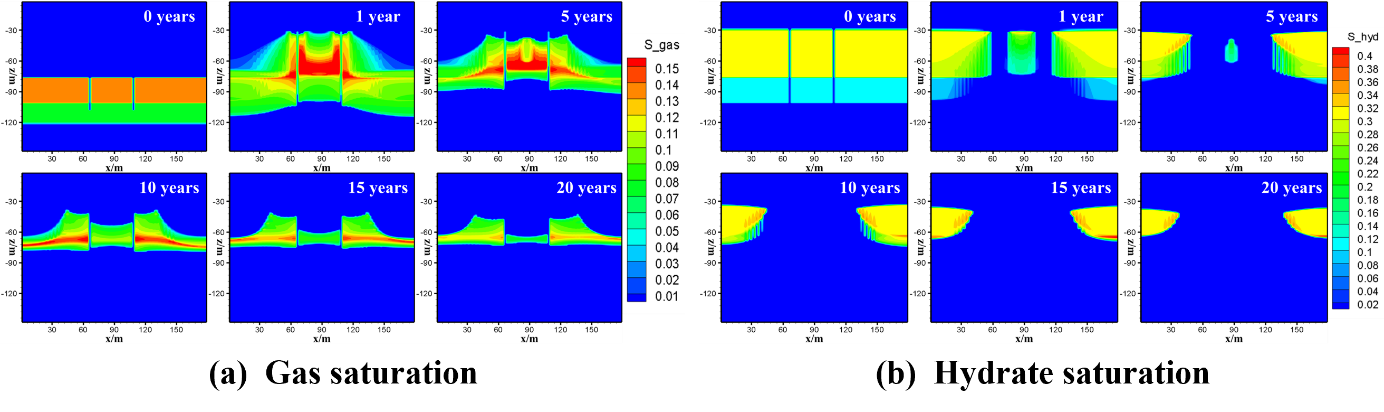


Figure 2. Spatiotemporal evolution of gas saturation field and hydrate saturation field, well spacing of 40m.


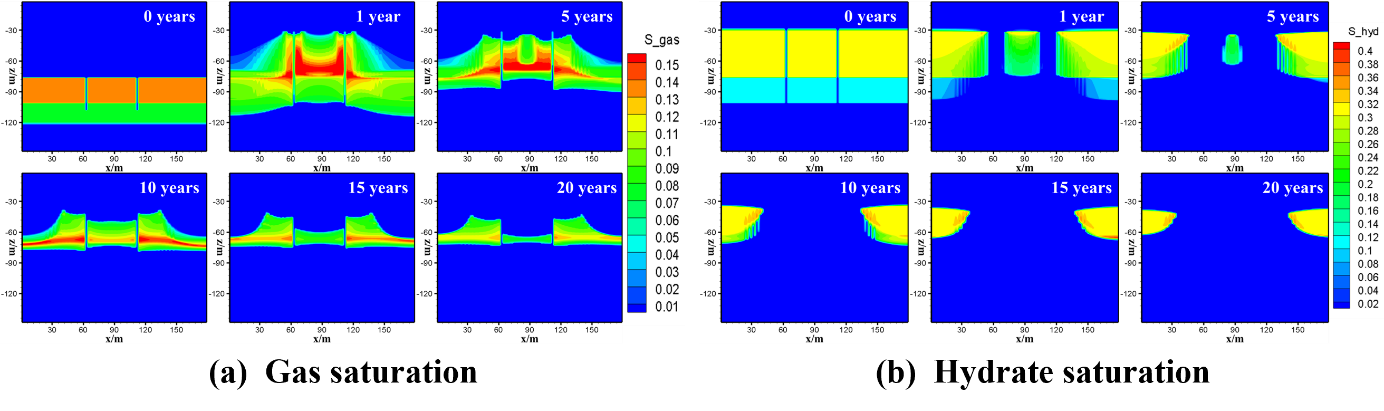


Figure 3. Spatiotemporal evolution of gas saturation field and hydrate saturation field, well spacing of 50m.


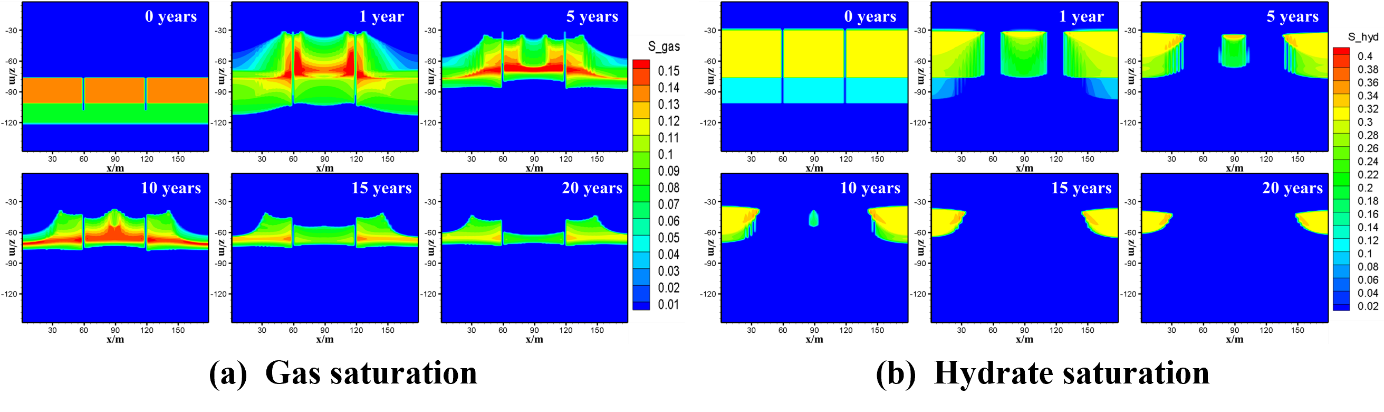


Figure 4. Spatiotemporal evolution of gas saturation field and hydrate saturation field, well spacing of 60m.
